# Supplementary material for: Detection of Serotype-Specific Antibodies to the Four Dengue Viruses Using an Immune Complex Binding (ICB) ELISA
Source: PubMed Central journal article supplement (PMC3873247; doi:10.1371/journal.pntd.0002580), 2013-12-26
Supplement: pntd.0002580.s002.pdf [file pntd.0002580.s002.pdf]

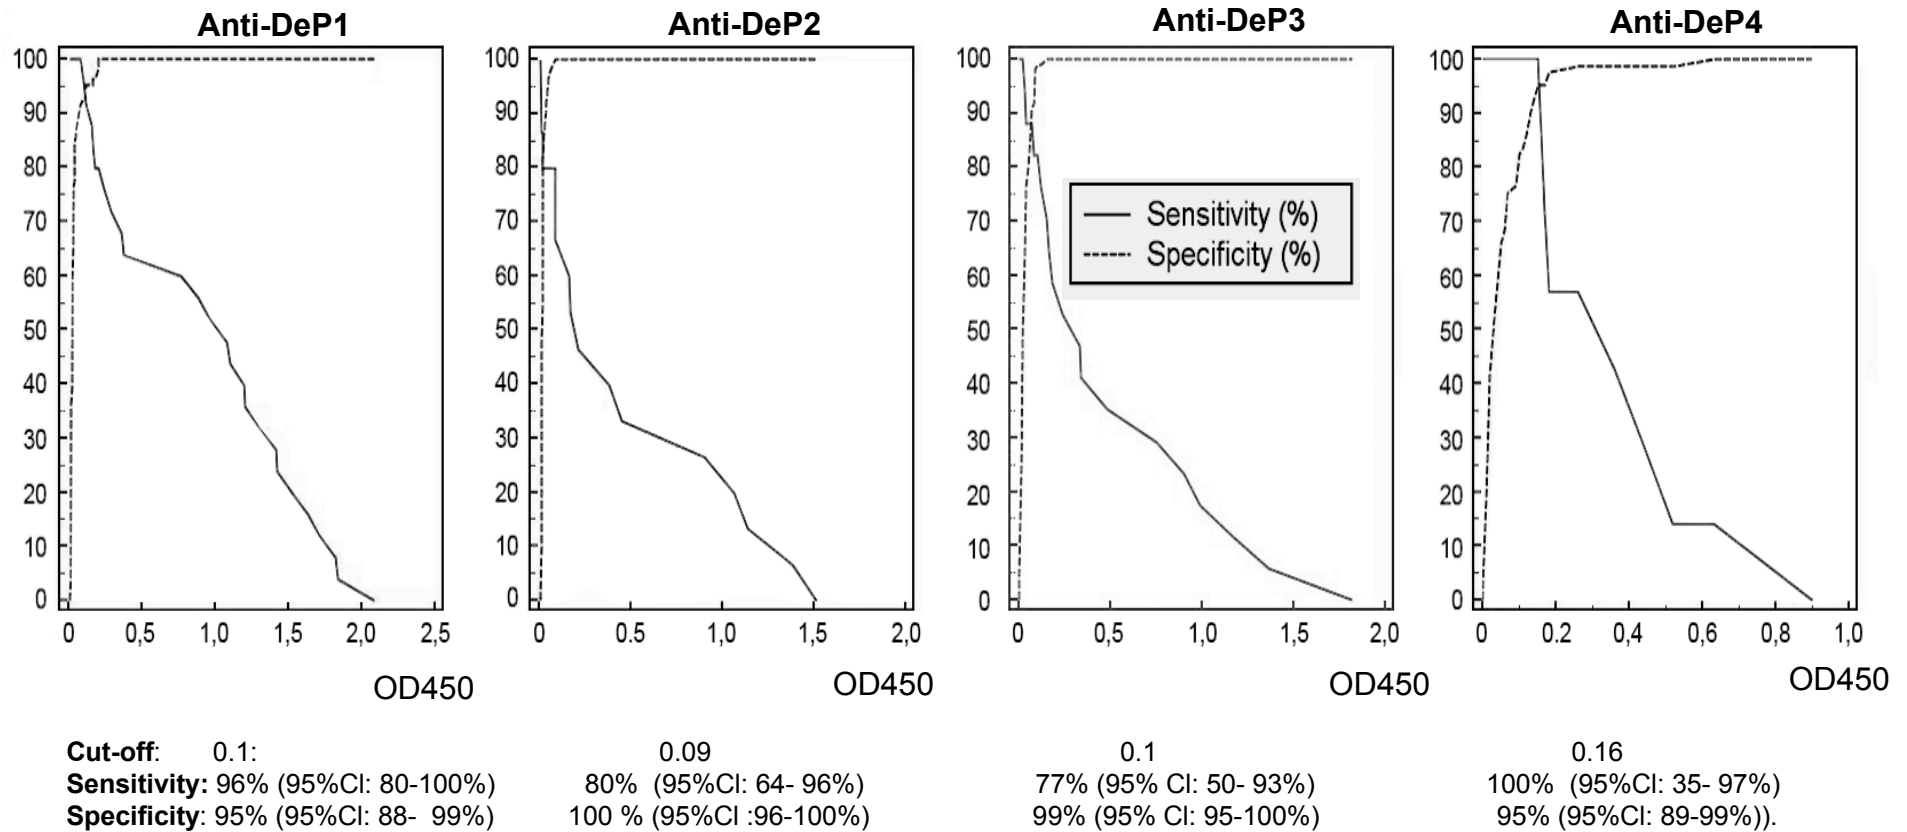

**Figure S1.**

TG-ROC analysis of the four ICB ELISAs. The OD values of 25 DENV-1, 15 DENV-2, 17 DENV-3, 7 DENV-4 samples were marked as positive (criterion 1) and the OD values of 110 antibody negative samples were marked as negative (criterion 0). Sensitivities and specificities are plotted against threshold (cut-off). Optimum cut-off values for each test can be determined. Sensitivities and specificities using cut-off values based on mean OD + 3 $\sigma$  of the 88 blood donor samples were also calculated. For all determinations, the area under curve (AUC) was >0.86 ( $p < 0.0001$ ). AUC of 0.8-1 means good to excellent test performance (accuracy).
