# Supplementary material for: Detection of Serotype-Specific Antibodies to the Four Dengue Viruses Using an Immune Complex Binding (ICB) ELISA
Source: PubMed Central journal article supplement (PMC3873247; doi:10.1371/journal.pntd.0002580), 2013-12-26

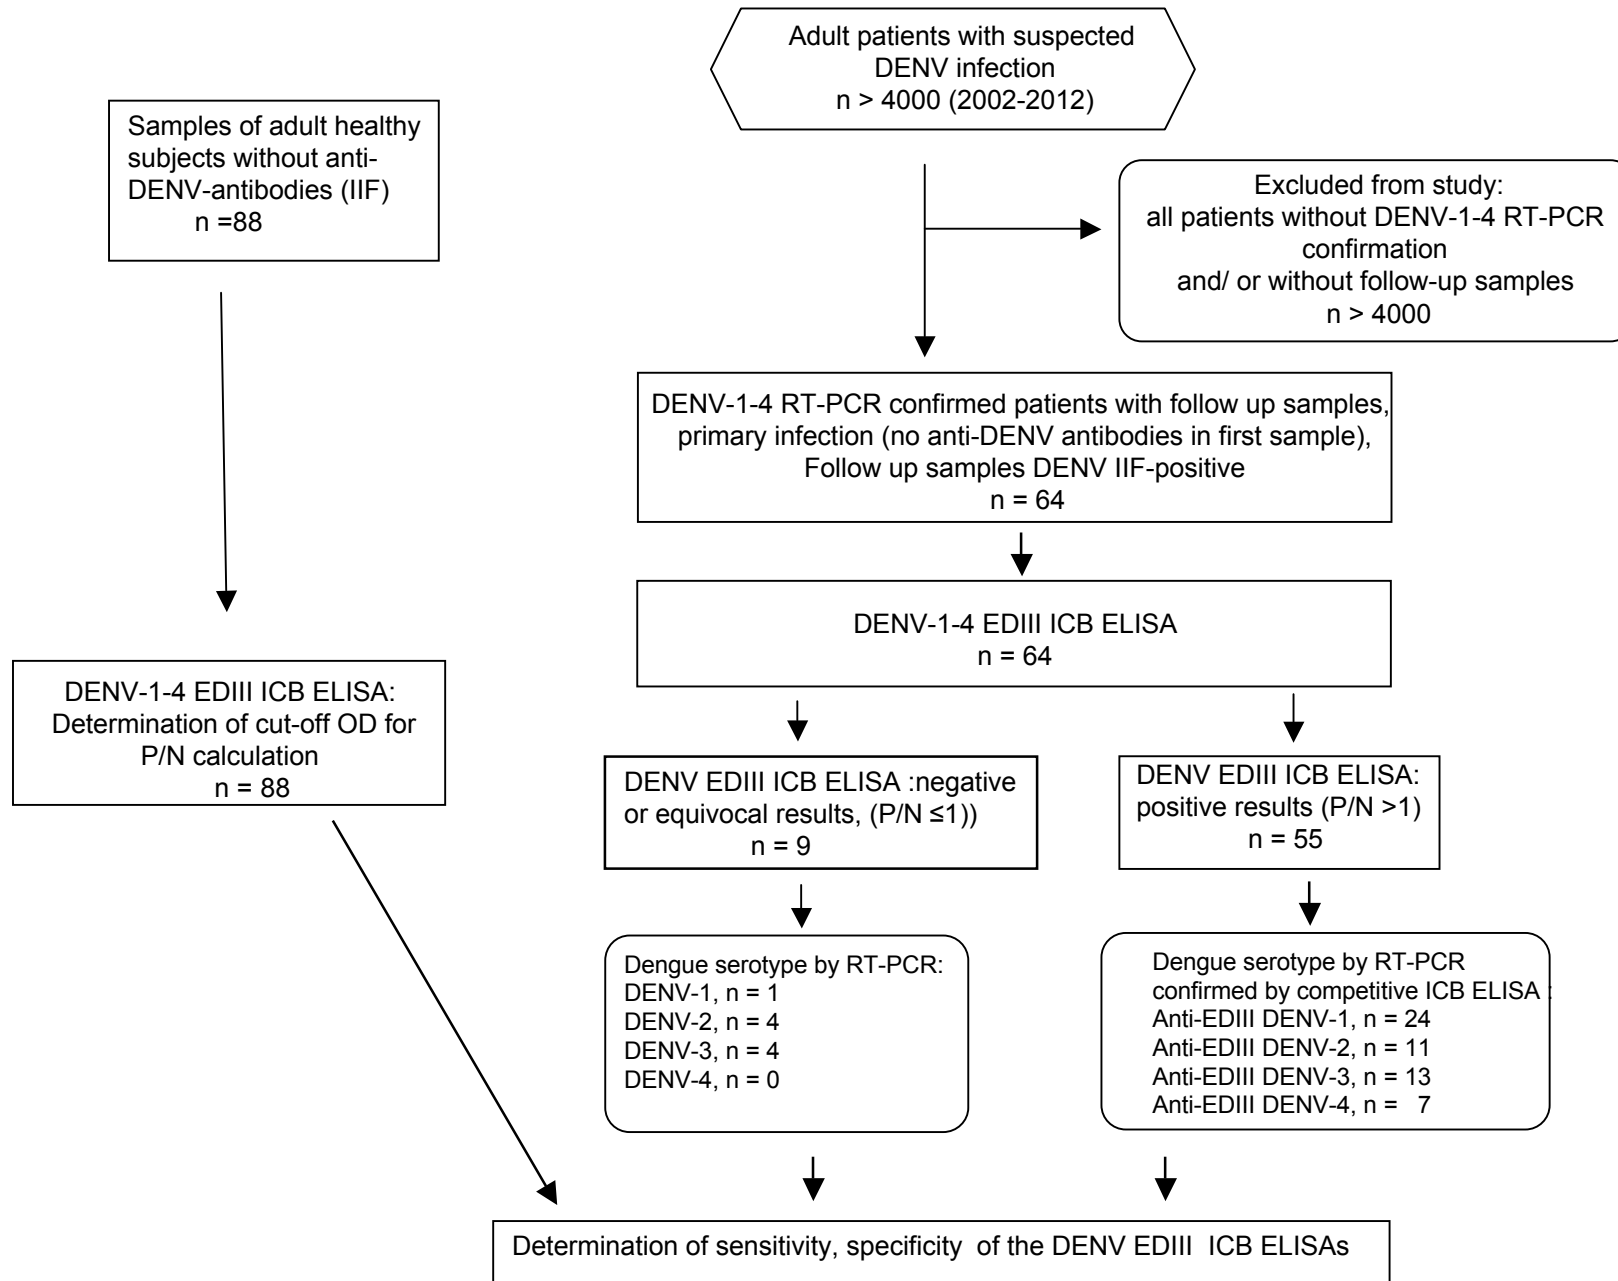

Supplement: pntd.0002580.s004.pdf [file pntd.0002580.s004.pdf]
