# Supplementary material for: Detection of Serotype-Specific Antibodies to the Four Dengue Viruses Using an Immune Complex Binding (ICB) ELISA
Source: PubMed Central journal article supplement (PMC3873247; doi:10.1371/journal.pntd.0002580), 2013-12-26
Supplement: pntd.0002580.s006.pdf [file pntd.0002580.s006.pdf]

**Table S2.** Antibody reactions of 55 dengue-positive sera to all four DENV DeP antigens using the ICB ELISA without competition. Shown are the OD values used for figure 2.

| <b>DENV1</b> |      |      |      |      |
|--------------|------|------|------|------|
| Patient No   | DeP1 | DeP2 | DeP3 | DeP4 |
| 1            | 0.85 | 0.04 | 0.03 | 0.12 |
| 2            | 2.02 | 0.25 | 0.34 | 0.14 |
| 3            | 0.2  | 0.02 | 0.09 | 0.28 |
| 4            | 2.04 | 0.03 | 0.62 | 0.05 |
| 5            | 0.17 | 0.04 | 0.03 | 0.06 |
| 6            | 1.57 | 0.04 | 0.33 | 0.05 |
| 7            | 0.18 | 0.03 | 0.08 | 0.08 |
| 8            | 2.32 | 0.26 | 1.13 | 0.34 |
| 9            | 0.42 | 0.02 | 0.23 | 0.10 |
| 10           | 1.07 | 0.23 | 0.11 | 0.37 |
| 11           | 1.33 | 0.01 | 0.25 | 0.07 |
| 12           | 0.41 | 0.05 | 0.08 | 0.08 |
| 13           | 0.72 | 0.12 | 0.03 | 0.08 |
| 14           | 0.13 | 0.05 | 0.03 | 0.14 |
| 15           | 1.34 | 0.05 | 0.11 | 0.11 |
| 16           | 1.22 | 0.23 | 0.24 | 0.08 |
| 17           | 1.69 | 0.05 | 0.06 | 0.10 |
| 18           | 1.20 | 0.06 | 0.42 | 0.42 |
| 19           | 1.81 | 0.05 | 0.32 | 0.09 |
| 20           | 1.58 | 0.01 | 0.03 | 0.11 |
| 21           | 1.44 | 0.21 | 0.42 | 0.06 |
| 22           | 0.98 | 0.1  | 0.03 | 0.12 |
| 23           | 1.90 | 0.03 | 0.51 | 0.07 |
| 24           | 0.27 | 0.03 | 0.08 | 0.10 |

| <b>DENV4</b> |      |      |      |      |
|--------------|------|------|------|------|
| Patient No   | DeP1 | DeP2 | DeP3 | DeP4 |
| 1            | 0.03 | 0.01 | 0.03 | 0.19 |
| 2            | 0.02 | 0.06 | 0.06 | 0.27 |
| 3            | 0.04 | 0.02 | 0.02 | 1.44 |
| 4            | 0.04 | 0.04 | 0.01 | 0.29 |
| 5            | 0.05 | 0.03 | 0.03 | 0.58 |
| 6            | 0.01 | 0.04 | 0.04 | 0.83 |
| 7            | 0.05 | 0.04 | 0.05 | 0.7  |

| <b>DENV2</b> |      |      |      |      |
|--------------|------|------|------|------|
| Patient No   | DeP1 | DeP2 | DeP3 | DeP4 |
| 1            | 0.07 | 1.04 | 0.1  | 0.11 |
| 2            | 0.05 | 0.36 | 0.05 | 0.07 |
| 3            | 0.07 | 0.42 | 0.09 | 0.12 |
| 4            | 0.06 | 0.10 | 0.09 | 0.10 |
| 5            | 0.09 | 1.26 | 0.13 | 0.14 |
| 6            | 0.06 | 0.20 | 0.06 | 0.10 |
| 7            | 0.11 | 0.17 | 0.11 | 0.18 |
| 8            | 0.09 | 0.82 | 0.07 | 0.14 |
| 9            | 0.06 | 1.38 | 0.10 | 0.09 |
| 10           | 0.09 | 0.16 | 0.07 | 0.15 |
| 11           | 0.10 | 0.98 | 0.25 | 0.16 |

| <b>DENV3</b> |      |      |      |      |
|--------------|------|------|------|------|
| Patient No   | DeP1 | DeP2 | DeP3 | DeP4 |
| 1            | 0.05 | 0.04 | 0.24 | 0.05 |
| 2            | 0.05 | 0.04 | 0.15 | 0.05 |
| 3            | 0.06 | 0.02 | 0.90 | 0.08 |
| 4            | 0.04 | 0.04 | 0.34 | 0.06 |
| 5            | 0.71 | 0.30 | 1.82 | 0.07 |
| 6            | 0.15 | 0.03 | 1.36 | 0.08 |
| 7            | 0.24 | 0.05 | 0.75 | 0.06 |
| 8            | 0.06 | 0.01 | 0.18 | 0.06 |
| 9            | 0.09 | 0.02 | 0.48 | 0.06 |
| 10           | 0.03 | 0.02 | 0.16 | 0.06 |
| 11           | 0.15 | 0.03 | 0.99 | 0.07 |
| 12           | 0.02 | 0.03 | 0.33 | 0.08 |
| 13           | 0.04 | 0.03 | 1.17 | 0.34 |
