# Supplementary material for: Detection of Serotype-Specific Antibodies to the Four Dengue Viruses Using an Immune Complex Binding (ICB) ELISA
Source: PubMed Central journal article supplement (PMC3873247; doi:10.1371/journal.pntd.0002580), 2013-12-26
Supplement: pntd.0002580.s008.pdf [file pntd.0002580.s008.pdf]

**Table S4.** P/N data for 12 Vietnamese subjects with supposed secondary DENV infections. Using the competitive ELISA results with two different DeP antigens were obtained (serum dilution 1:100).

| Patient No | DeP1       | DeP2       | DeP3        | DeP4       | Serotype |
|------------|------------|------------|-------------|------------|----------|
| 26         | <b>2.7</b> | 0.2        | 0.7         | <b>7.6</b> | 1, 4     |
| 32         | 1.1        | 1.1        | <b>8.4</b>  | <b>9.2</b> | 3, 4     |
| 44         | <b>6.1</b> | 0.5        | <b>2.3</b>  | 0.8        | 1, 3     |
| 53         | <b>8.2</b> | 0.8        | <b>6.7</b>  | 0.3        | 1, 3     |
| 59         | 0.8        | 0.7        | <b>5.2</b>  | <b>2.0</b> | 3, 4     |
| 61         | <b>3.6</b> | 0.2        | <b>4.5</b>  | 0.9        | 1, 3     |
| 69         | <b>5.1</b> | 0.5        | <b>8.5</b>  | 0.8        | 1, 3     |
| 71         | 0.8        | 0.2        | <b>10.3</b> | <b>6.5</b> | 3, 4     |
| 75         | <b>2.7</b> | <b>7.1</b> | 0.8         | 0.5        | 1, 2     |
| 77         | <b>2.1</b> | <b>5.3</b> | 0.7         | 1.1        | 1, 2     |
| 81         | <b>4.4</b> | 0.9        | 0.9         | <b>7.2</b> | 1, 4     |
| 85         | <b>2.6</b> | <b>8.5</b> | 0.7         | 0.5        | 1, 2     |
